# Supplementary material for: Efficacy of Endocuff Vision compared to first-generation Endocuff in adenoma detection rate and polyp detection rate in high-definition colonoscopy: a systematic review and network meta-analysis
Source: PubMed Central journal article supplement — Endosc Int Open. 2021 Jan 1;9(1):E41–50. doi: 10.1055/a-1293-7327 (PMC7775814; doi:10.1055/a-1293-7327), 2021-01-01

## Supplementary material

**Supplementary Table 1** EMBASE search strategy.

| No. | Query                                                                                                                                                                                                   | Results |
|-----|---------------------------------------------------------------------------------------------------------------------------------------------------------------------------------------------------------|---------|
| 1.  | endocuff* OR 'endo cuff*' OR endocuff*.dn                                                                                                                                                               | 169     |
| 2.  | colonoscop* OR coloscop* OR 'colonoscopy'/exp<br>OR 'colonoscope'/exp OR 'colonoscopic<br>accessory'/exp OR 'colonic endoscopy cuff'/exp                                                                | 87484   |
| 3.  | #1 AND #2                                                                                                                                                                                               | 163     |
| 4.  | #3 NOT ('animal experiment'/de OR 'case<br>report'/de OR 'meta analysis'/de OR 'model'/de<br>OR 'network meta-analysis'/de OR 'nonhuman'/de<br>OR 'practice guideline'/de OR 'systematic<br>review'/de) | 126     |
| 5.  | #4 NOT ('conference review'/it OR 'editorial'/it OR<br>'review'/it OR 'short survey'/it)                                                                                                                | 108     |

**Supplementary Table 2** Adverse events compared based on network meta-analysis.

| Adverse event    | No. of Studies compared | HD vs ECU                  | HD vs ECV          | ECV vs ECU                 |                |
|------------------|-------------------------|----------------------------|--------------------|----------------------------|----------------|
|                  |                         | RR (95 % CI)               |                    |                            | I <sup>2</sup> |
| Any complication | 11                      | <b>0.20 (0.08 – 0.50)*</b> | 1.40 (0.31 – 6.33) | <b>0.14 (0.02 – 0.84)*</b> | 15.3%          |
| Perforation      | 11                      | 1.17 (0.22 – 6.39)         | 1.25 (0.28 – 5.53) | 0.94 (0.10 – 8.94)         | 0%             |
| Laceration       | 11                      | <b>0.12 (0.05 – 0.29)*</b> | 1.05 (0.21 – 5.17) | <b>0.11 (0.02 – 0.70)*</b> | 0%             |
| Bleeding         | 11                      | 0.97 (0.24 – 3.88)         | 1.21 (0.25 – 5.72) | 0.80 (0.10 – 6.45)         | 0%             |

CI, confidence interval; ECU, first-generation Endocuff colonoscopy; ECV, Endocuff

Vision colonoscopy; HD, high-definition colonoscopy; RR: relative risk.

## Supplementary material

**Supplementary Table 3** Risk of bias for individual studies based on Cochrane risk of bias tools.

| Study, year               | Random sequence generation (selection bias) | Allocation concealment (selection bias) | Blinding of participants and personnel (performance bias) | Blinding of outcome assessment (detection bias) | Incomplete outcome data (attrition bias) | Selective reporting (reporting bias) |
|---------------------------|---------------------------------------------|-----------------------------------------|-----------------------------------------------------------|-------------------------------------------------|------------------------------------------|--------------------------------------|
| Biecker, 2015 [26]        | Low                                         | Unclear                                 | High                                                      | High                                            | Low                                      | Low                                  |
| De Palma, 2018 [27]       | Low                                         | Low                                     | High                                                      | High                                            | Low                                      | Low                                  |
| Floer, 2014 <sup>28</sup> | Low                                         | Low                                     | High                                                      | High                                            | Low                                      | Low                                  |
| Van Doorne, 2017 [31]     | Low                                         | Unclear                                 | High                                                      | High                                            | Low                                      | Low                                  |
| Wada, 2018 [32]           | Low                                         | Low                                     | High                                                      | High                                            | Low                                      | Low                                  |
| Rex (1), 2018 [34]        | Low                                         | Low                                     | High                                                      | High                                            | Low                                      | Low                                  |
| Bhattacharyya, 2017 [25]  | Low                                         | Low                                     | High                                                      | High                                            | Low                                      | Low                                  |
| Jacob, 2019 [29]          | Low                                         | Low                                     | High                                                      | High                                            | Low                                      | Low                                  |
| Ngu, 2017 [15]            | Low                                         | Unclear                                 | High                                                      | High                                            | Low                                      | Low                                  |
| Rex (2), 2019 [30]        | Low                                         | Low                                     | High                                                      | High                                            | Low                                      | Low                                  |
| Von Figura, 2019 [33]     | Low                                         | Low                                     | High                                                      | High                                            | Low                                      | Low                                  |
| Karsenti, 2020 [35]       | High                                        | High                                    | High                                                      | High                                            | Low                                      | Low                                  |

## Supplementary material

**Supplementary Fig. 1** Forrest plot for direct meta-analysis comparing **a** MPP for ECU vs HD, **b** MPP for ECV vs HD, **c** MAP for ECU vs HD, and **d** MAP for ECV vs HD. CI, confidence interval; ECU, first-generation Endocuff colonoscopy; ECV, Endocuff Vision colonoscopy; MAP, mean adenoma per procedure; MPP, mean polyp per procedure.

(A)

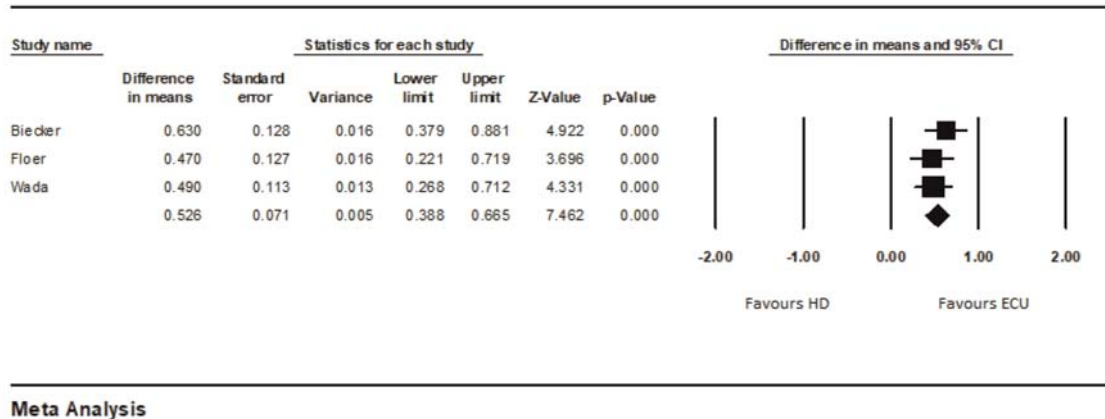

(B)

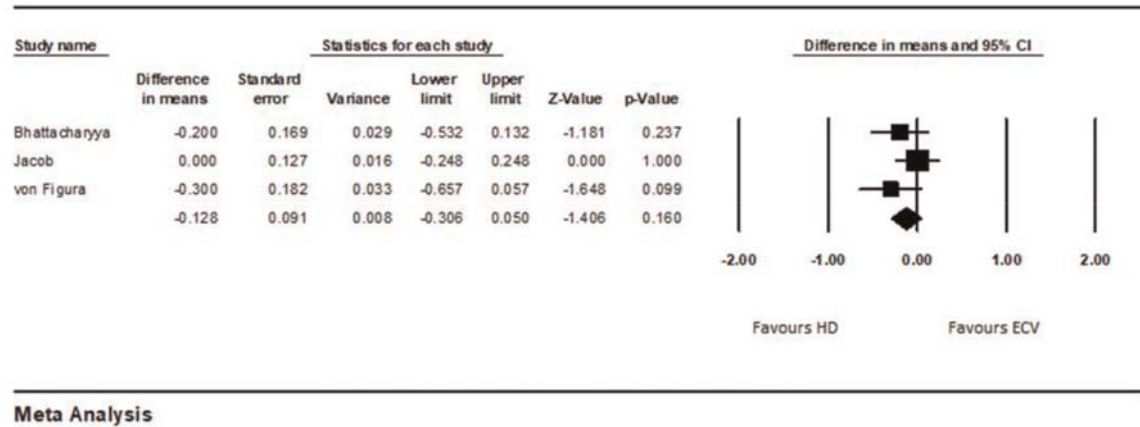

## Supplementary material

(C)

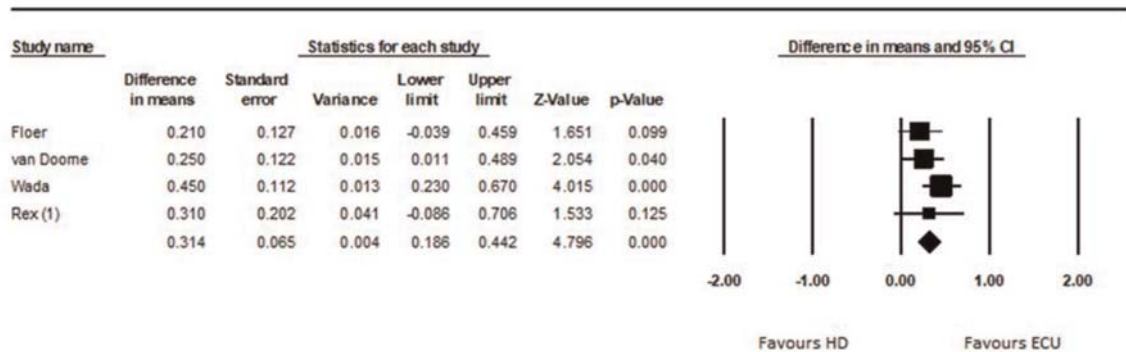

### Meta Analysis

(D)

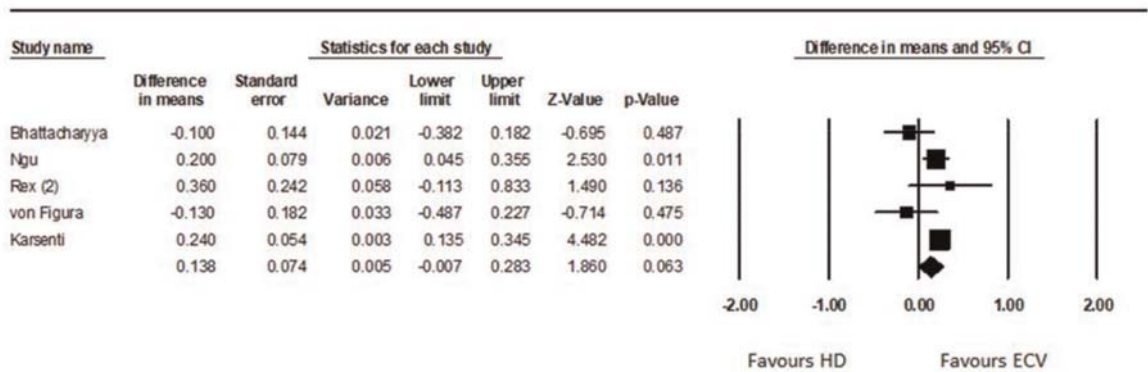

### Meta Analysis

## Supplementary material

**Supplementary Fig. 2** Network diagram for **a** PDR, **b** ADR, **c** SADR, **d** NDR, **e** AADR, **f** CIR, **g** MPP, and **h** MAP. AADR, advanced adenoma detection rate; ADR, adenoma detection rate; CIR, cecal intubation rate; ECU, first-generation Endocuff; ECV, Endocuff Vision; HD, high-definition colonoscopy; MAP, mean adenoma per procedure; MPP, mean polyp per procedure; NDR, neoplasia detection rate; PDR, polyp detection rate. Note: Line represents a direct comparison, width of line corresponds to weight, overall effect and number of studies).

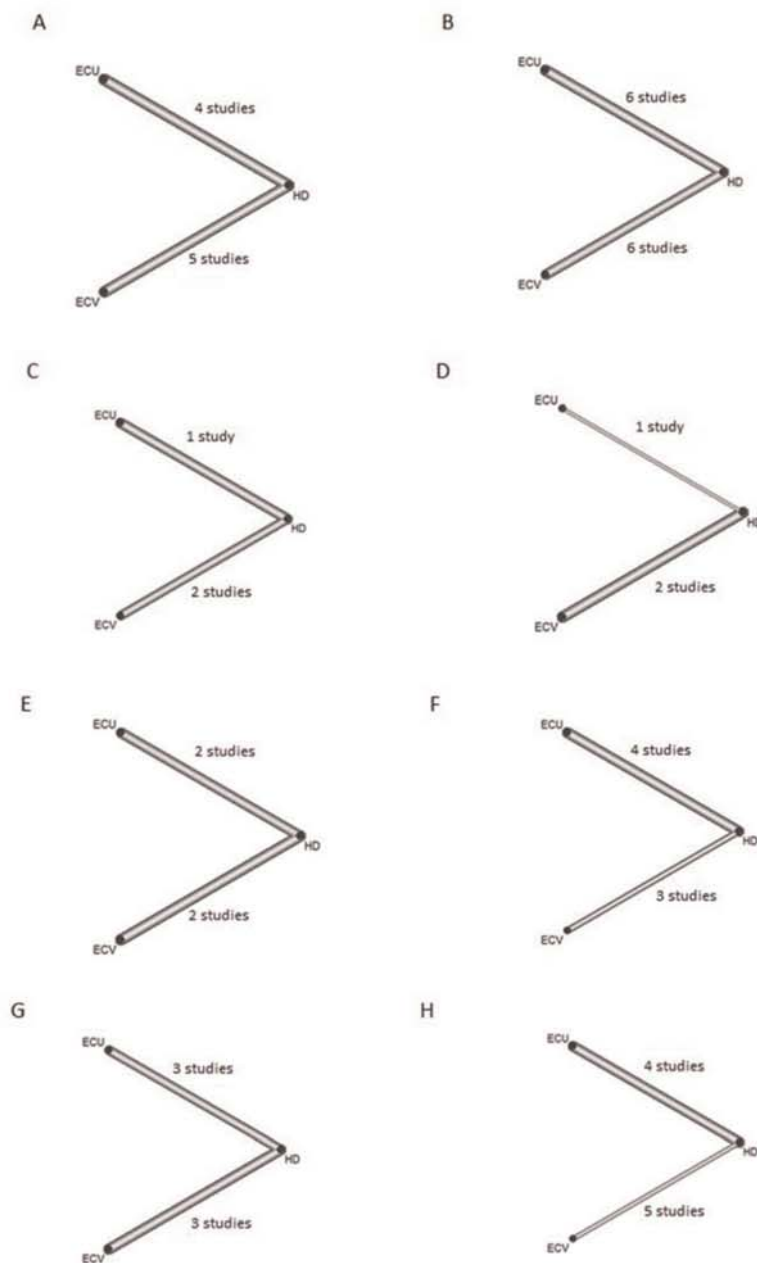

## Supplementary material

**Supplementary Fig. 3** Ranking for intervention based on outcomes. A higher P score correspond to superior detection rates or lower complication rates. AADR, advanced adenoma detection rate; ADR, adenoma detection rate; CIR, cecal intubation rate; ECU, first-generation Endocuff colonoscopy; ECV, Endocuff Vision colonoscopy; HD, high-definition colonoscopy; MAP, mean adenoma per procedure; MPP, mean polyp per procedure; NDR, neoplasia detection rate; PDR, polyp detection rate; SADR, serrated adenoma detection rate.

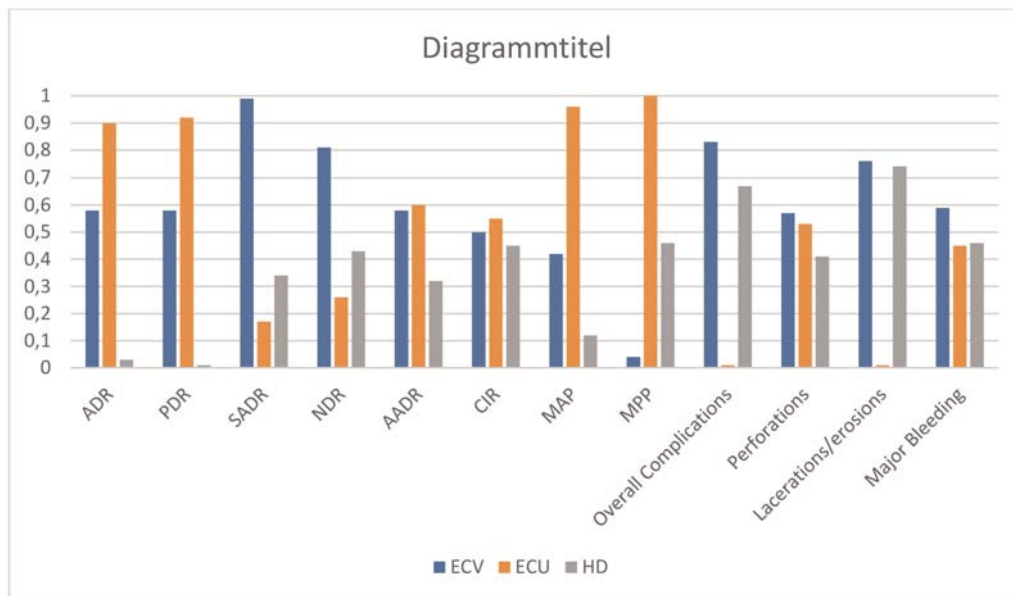

## Supplementary material

**Supplementary Fig. 4** Funnel plot based on overall ADR for all interventions with visible symmetry.

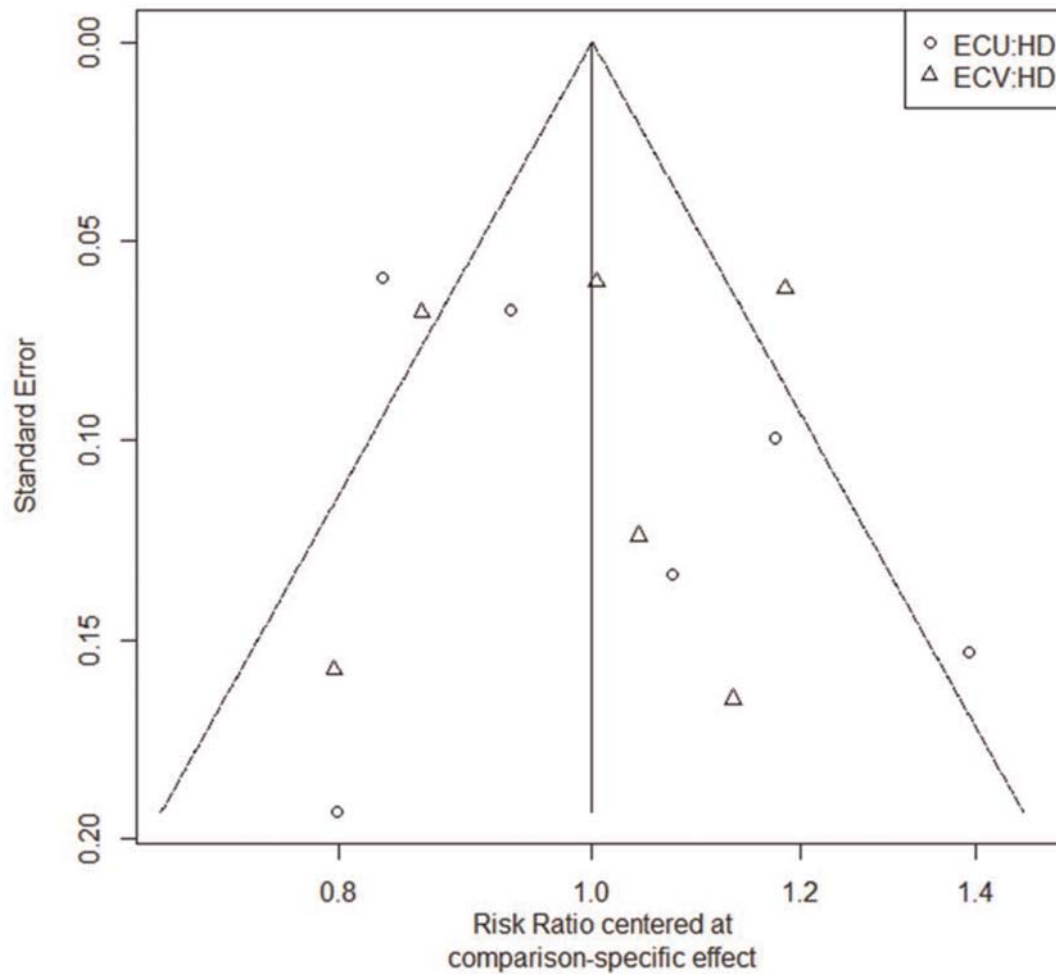

Supplement: 2053supmat_10-1055-a-1293-7327.pdf [file 2053supmat_10-1055-a-1293-7327.pdf]
